# Supplementary material for: Mindset and Reflection—How to Sustainably Improve Intra- and Interpersonal Competences in Medical Education
Source: MDPI journal article supplement (doi:10.3390/healthcare11060859), 2023-03-14
Supplement: s1 [file s1]

### Demographics of interview partners

| Sampling category                                                | Profession                         | Sex / Age         | Professional years | Background                                                                                                                                                                                                                           |
|------------------------------------------------------------------|------------------------------------|-------------------|--------------------|--------------------------------------------------------------------------------------------------------------------------------------------------------------------------------------------------------------------------------------|
| Medical professional – Physician – high valuation of IICs        | Physician<br>Medical teacher       | Male / 58 years   | 22 years           | <ul style="list-style-type: none"> <li>Teacher for patient centred communication</li> <li>Working on medical curricula</li> <li>Clinical mediator in residency programme</li> </ul>                                                  |
| Medical professional – Physician – high valuation of IICs        | Physician<br>Medical teacher       | Female            | 26 years           | <ul style="list-style-type: none"> <li>General Medicine</li> <li>Master of medical education</li> <li>Educational research</li> <li>Training representative for physicians' training focused on communicative competences</li> </ul> |
| Medical professional – Physician – high valuation of IICs        | Physician<br>Medical teacher       | Male / 57 years   | 33 years           | <ul style="list-style-type: none"> <li>Chair of the department of psychosomatic medicine</li> </ul>                                                                                                                                  |
| Medical professional – Physician – high valuation of IICs        | Physician<br>Medical teacher       | Male / 63 years   | 38 years           | <ul style="list-style-type: none"> <li>General physician</li> <li>Communication skills trainer</li> </ul>                                                                                                                            |
| Medical professional – Physician – high valuation of IICs        | Physician<br>Medical teacher       | Female / 37 years | 4 years            | <ul style="list-style-type: none"> <li>General physician</li> <li>Communication skills trainer</li> <li>PhD palliative care</li> </ul>                                                                                               |
| Medical professional – Physician – high valuation of IICs        | Physician<br>Psychological teacher | Female / 59 years | > 30 years         | <ul style="list-style-type: none"> <li>Teacher for clinical psychology and psychotherapy</li> </ul>                                                                                                                                  |
| Medical professional – Physician – high valuation of IICs        | Physician                          | Female / 32 years | 4 years            | <ul style="list-style-type: none"> <li>Assistant physician for neurology and psychiatry</li> </ul>                                                                                                                                   |
| Medical professional – Physician – restrictive valuation of IICs | Physician<br>Medical teacher       | Male / 51 years   | 24 years           | <ul style="list-style-type: none"> <li>Chair of the department for cardiology</li> <li>Deputy hospital director</li> </ul>                                                                                                           |
| Medical professional – Physician – restrictive valuation of IICs | Physician                          | Male / 33 years   | 3 years            | <ul style="list-style-type: none"> <li>Assistant physician orthopaedics / trauma surgery</li> </ul>                                                                                                                                  |
| Medical profession –                                             | Physician<br>Patients' advisor     | Female / 60 years | 34 years           | <ul style="list-style-type: none"> <li>Medical advisor for patients in health insurance</li> </ul>                                                                                                                                   |

|                                                                                       |                                    |                   |          |                                                                                                                                                                                                                                      |
|---------------------------------------------------------------------------------------|------------------------------------|-------------------|----------|--------------------------------------------------------------------------------------------------------------------------------------------------------------------------------------------------------------------------------------|
| patients' representation                                                              |                                    |                   |          |                                                                                                                                                                                                                                      |
| Medical profession – medical students                                                 | Medical student                    | Male / 27 years   | -        | <ul style="list-style-type: none"> <li>• 6<sup>th</sup> year-medical student</li> </ul>                                                                                                                                              |
| Medical profession – medical students                                                 | Medical student                    | Female / 23 years | -        | <ul style="list-style-type: none"> <li>• 4<sup>th</sup> year-medical student</li> </ul>                                                                                                                                              |
| Medical profession – nursing                                                          | Medical teacher                    | Female / 57 years | 31 years | <ul style="list-style-type: none"> <li>• Nurse</li> <li>• Trainer palliative care</li> <li>• Therapy research</li> </ul>                                                                                                             |
| Medical profession – nursing                                                          | Nurse                              | Female / 51 years | 33 years | <ul style="list-style-type: none"> <li>• Nurse</li> <li>• Quality management</li> </ul>                                                                                                                                              |
| Other profession with professional view on medical culture                            | Health journalist                  | Female            | 33 years |                                                                                                                                                                                                                                      |
| Other profession with professional view on medical culture – patients' representation | Pedagogue Patients' representative | Male / 57 years   | 31 Years | <ul style="list-style-type: none"> <li>• Patients' representative at "Federal centre for health education" (BzgA)</li> </ul>                                                                                                         |
| Other profession with professional view on medical culture – patients' representation | Patients' advisor                  | Male / 38 years   | 14 years | <ul style="list-style-type: none"> <li>• Health economy</li> <li>• Health insurance management</li> <li>• Management of "unabhängige Patienten Beratung Deutschland", an independent patient counseling center in Germany</li> </ul> |
| Other profession with professional view on medical culture                            | Social worker Medical teacher      | Female / 61 years | 36 years | <ul style="list-style-type: none"> <li>• Teaching and researching at department of nursing for intrapersonal skills, interpersonal communication and domestic violence</li> </ul>                                                    |
| Other profession with professional view on medical culture                            | Pedagogue                          | Female / 53 years | 20 years | <ul style="list-style-type: none"> <li>• Teaching</li> <li>• Training representative of teachers' training</li> </ul>                                                                                                                |
| Other profession with professional view on medical culture                            | Pilots' trainer                    | Male / 61 years   | 35 years | <ul style="list-style-type: none"> <li>• Pilot</li> <li>• Aviation Trainer</li> <li>• Researcher for aviation security</li> </ul>                                                                                                    |

|                                                                        |        |                    |          |                                                                                                    |
|------------------------------------------------------------------------|--------|--------------------|----------|----------------------------------------------------------------------------------------------------|
| Other profession<br>with<br>professional<br>view on medical<br>culture | Lawyer | Male / 70<br>years | 46 years | <ul style="list-style-type: none"> <li>• Legal studies</li> <li>• Management consulting</li> </ul> |
|------------------------------------------------------------------------|--------|--------------------|----------|----------------------------------------------------------------------------------------------------|
