# Supplementary material for: Mindset and Reflection—How to Sustainably Improve Intra- and Interpersonal Competences in Medical Education
Source: Healthcare (Basel). 2023 Mar 14;11(6):859. doi: 10.3390/healthcare11060859 (PMC10048539; doi:10.3390/healthcare11060859)
Supplement: Supplementary file 1 [file healthcare-11-00859-s001.zip]

Archive with 4 entries (4 files):
- File S1-Questionnaire.pdf
- File S2-COREQ_checklist.pdf
- File S3-Interviewees'_Demographics.pdf
- File S4-Steps_of_coding.pdf
