# Supplementary figures and images for: Mindset and Reflection—How to Sustainably Improve Intra- and Interpersonal Competences in Medical Education
Source: MDPI journal article supplement (doi:10.3390/healthcare11060859), 2023-03-14

Steps of coding

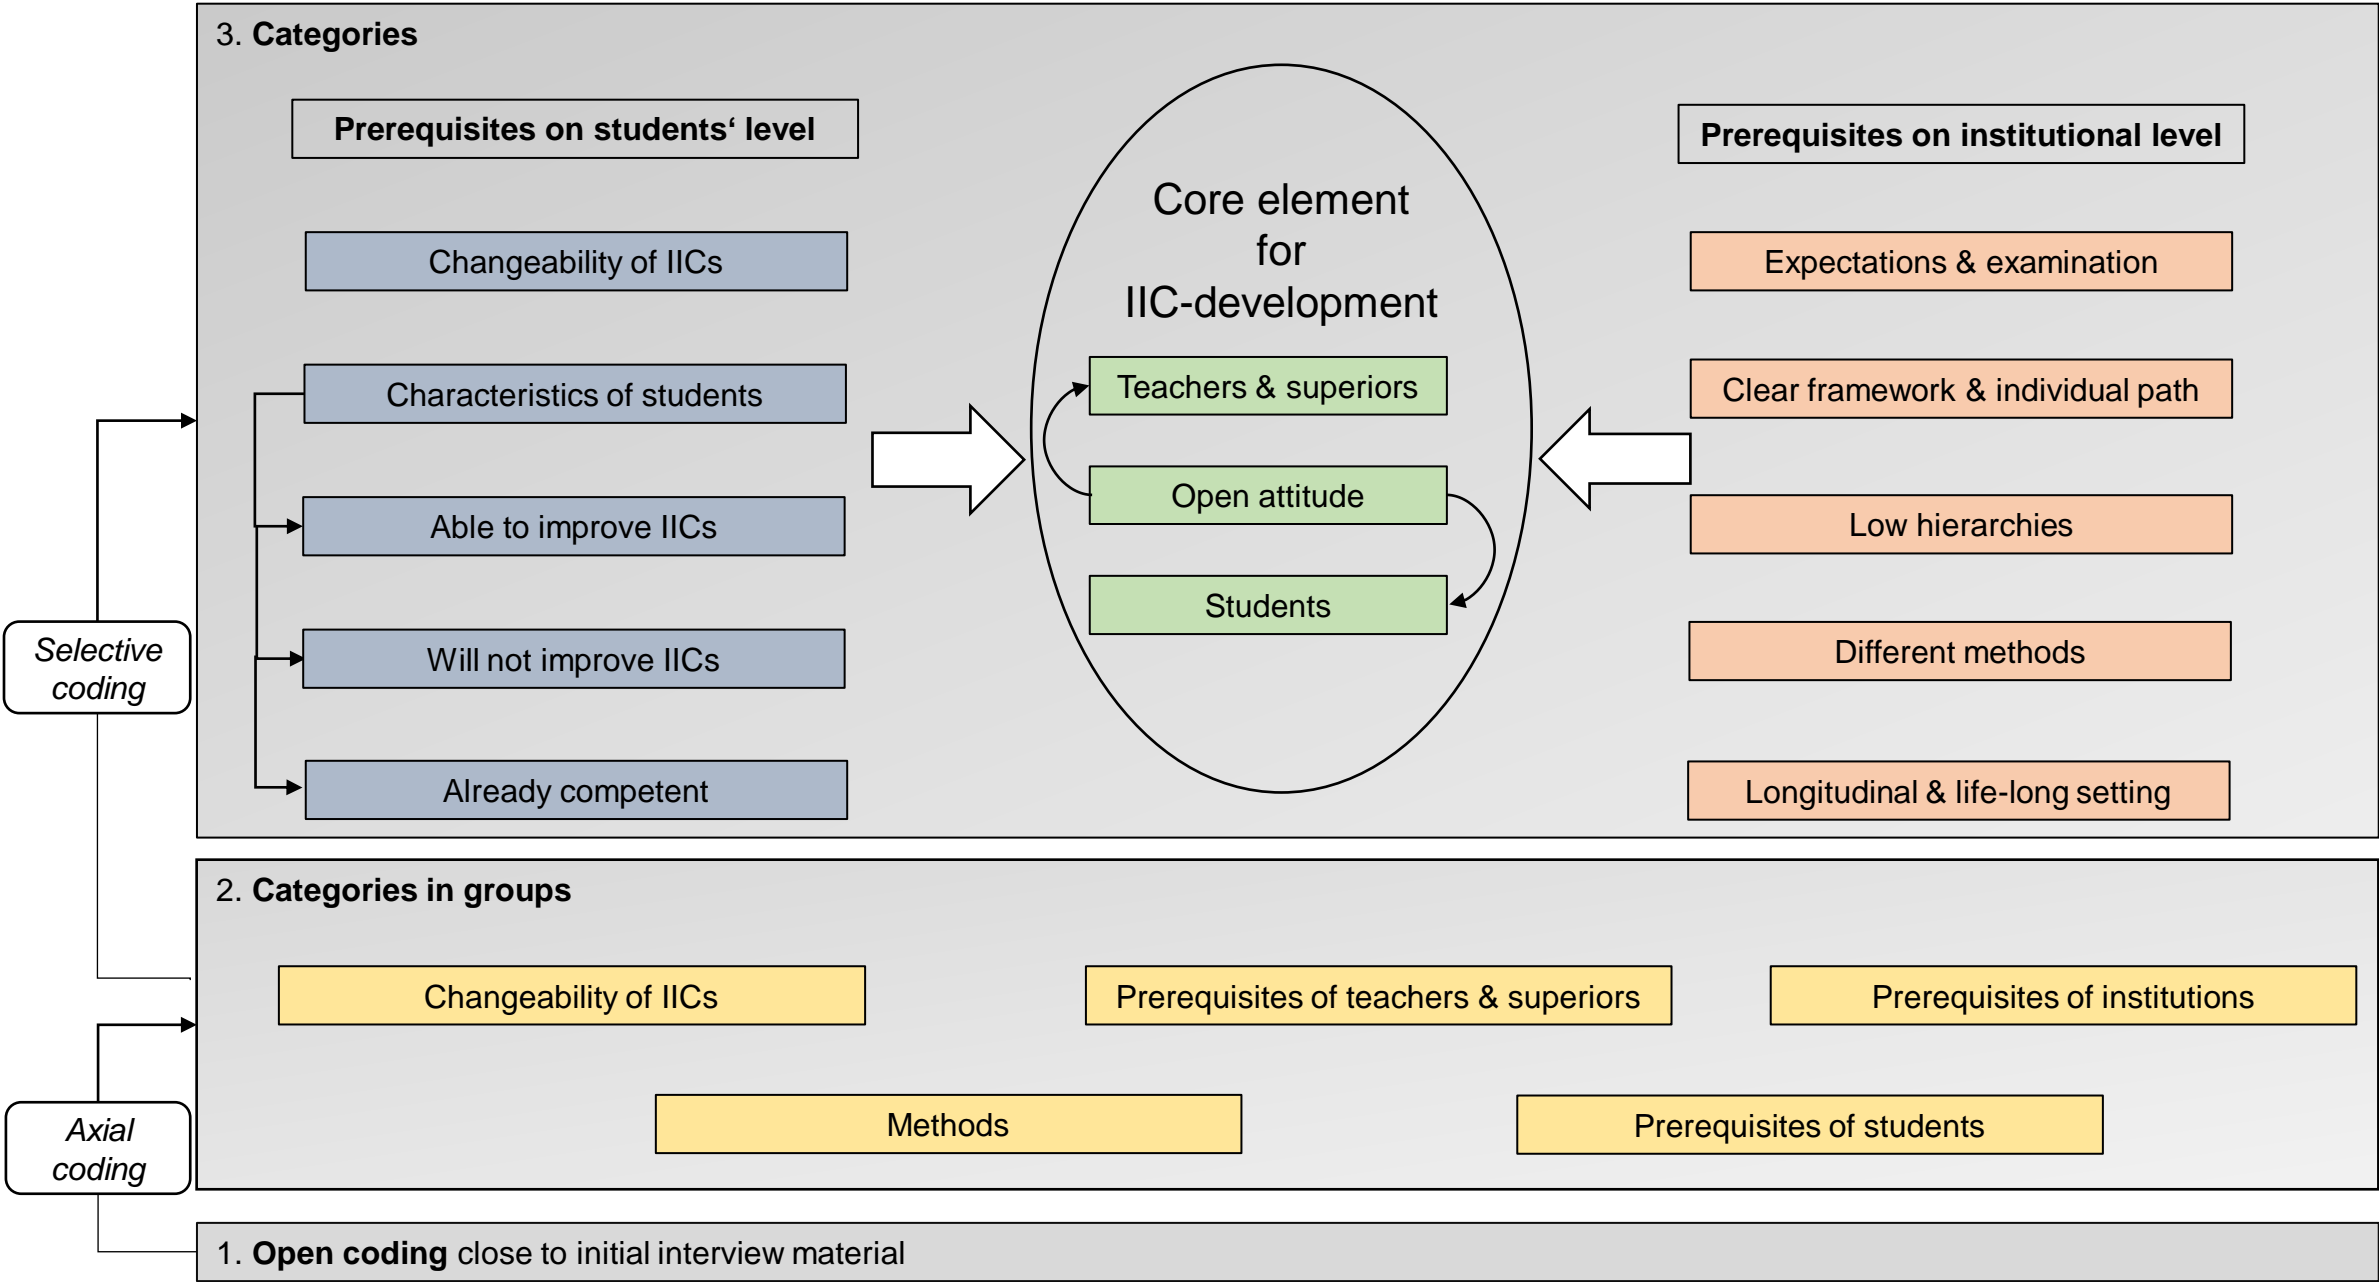

Supplement: s1 [file s1]
